# Supplementary figures and images for: Lactoferricins impair the cytosolic membrane of Escherichia coli within a few seconds and accumulate inside the cell
Source: eLife journal article supplement (doi:10.7554/elife.72850), 2022-06-07

LF11-215

LF11-324

O-LF11-215

ATCC  
25922

A

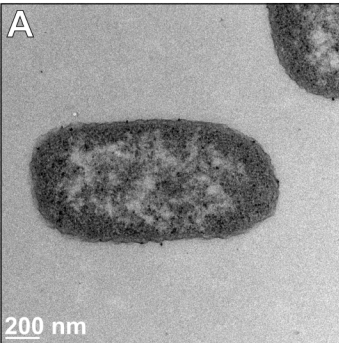

B

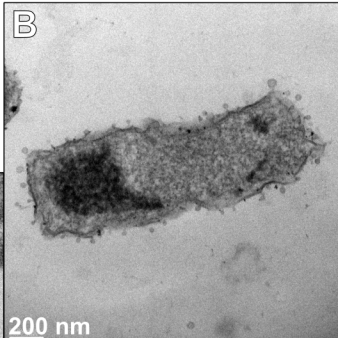

C

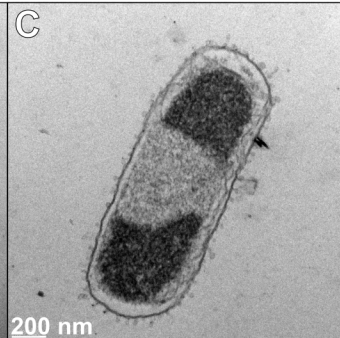

D

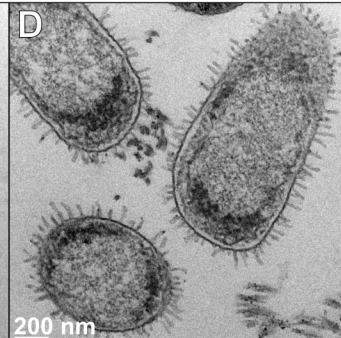

[MIC]

E

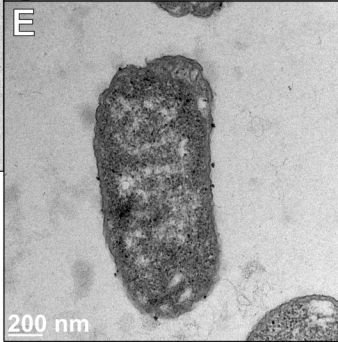

F

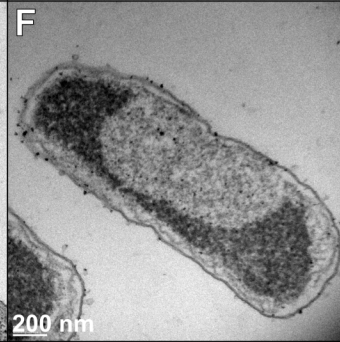

G

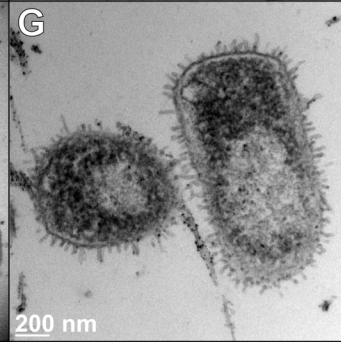

[MIC]/2

Supplement: supp [file elife-72850-supp-v1.zip]

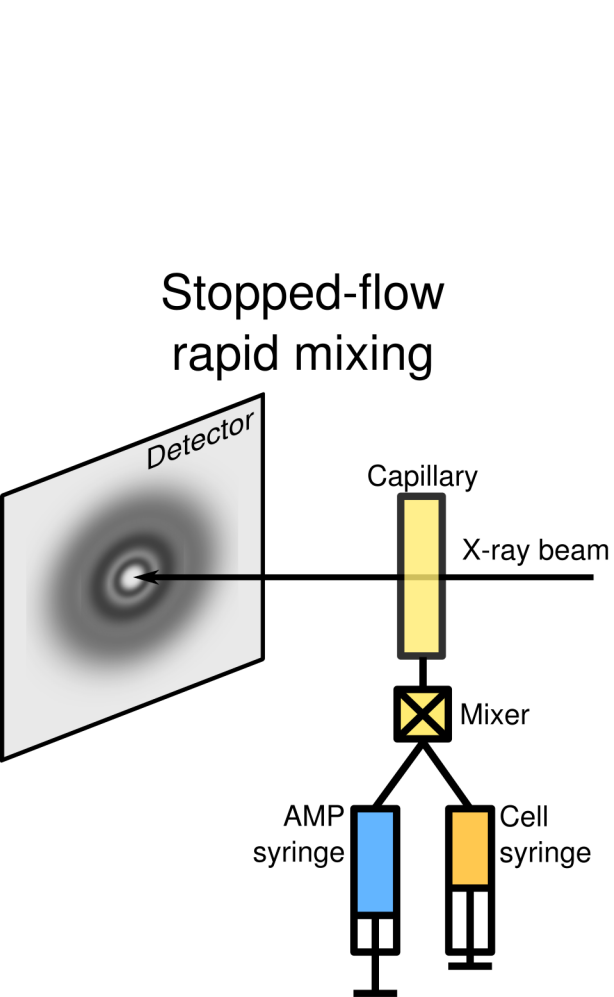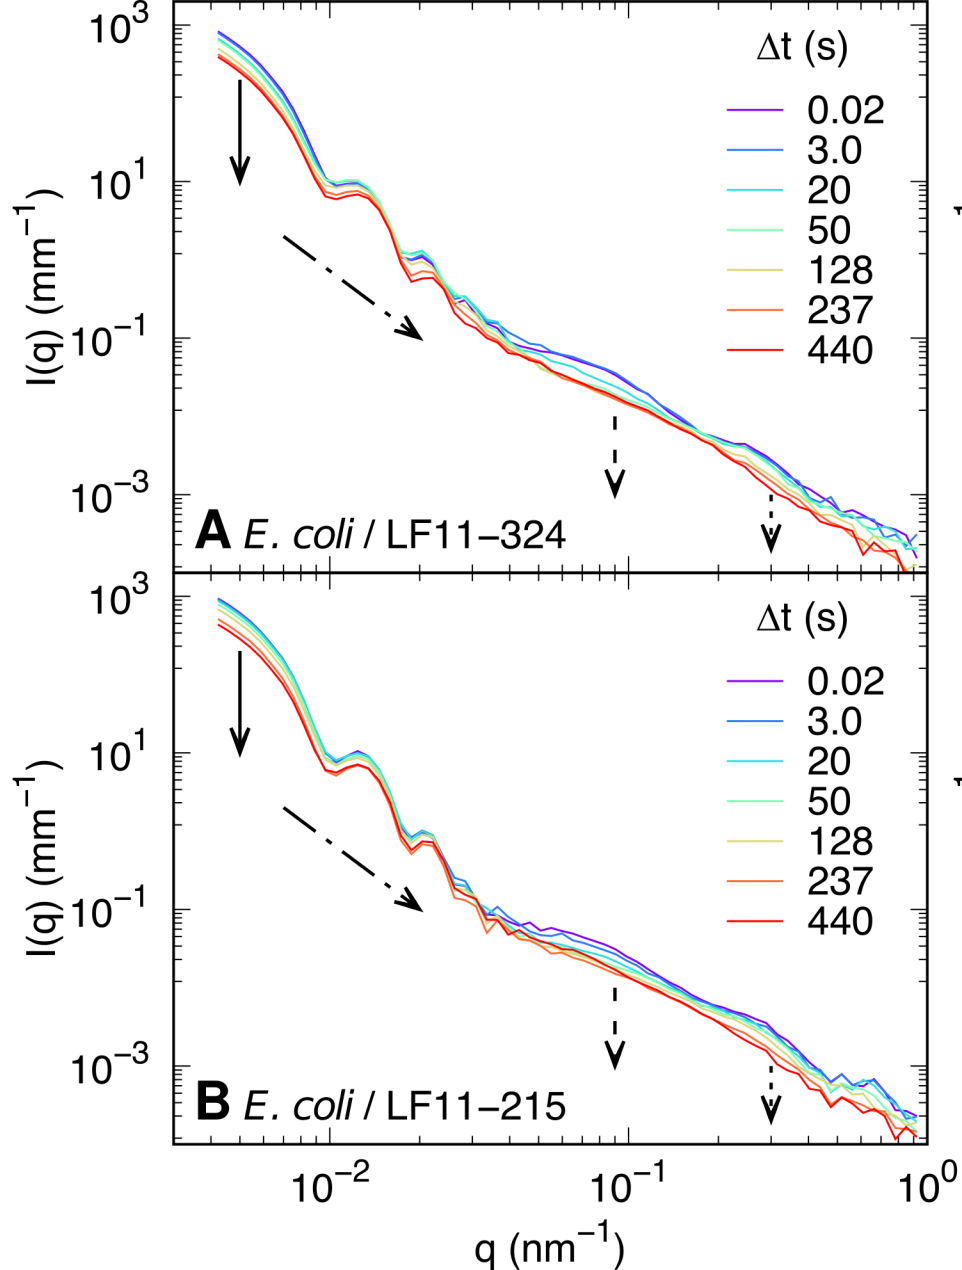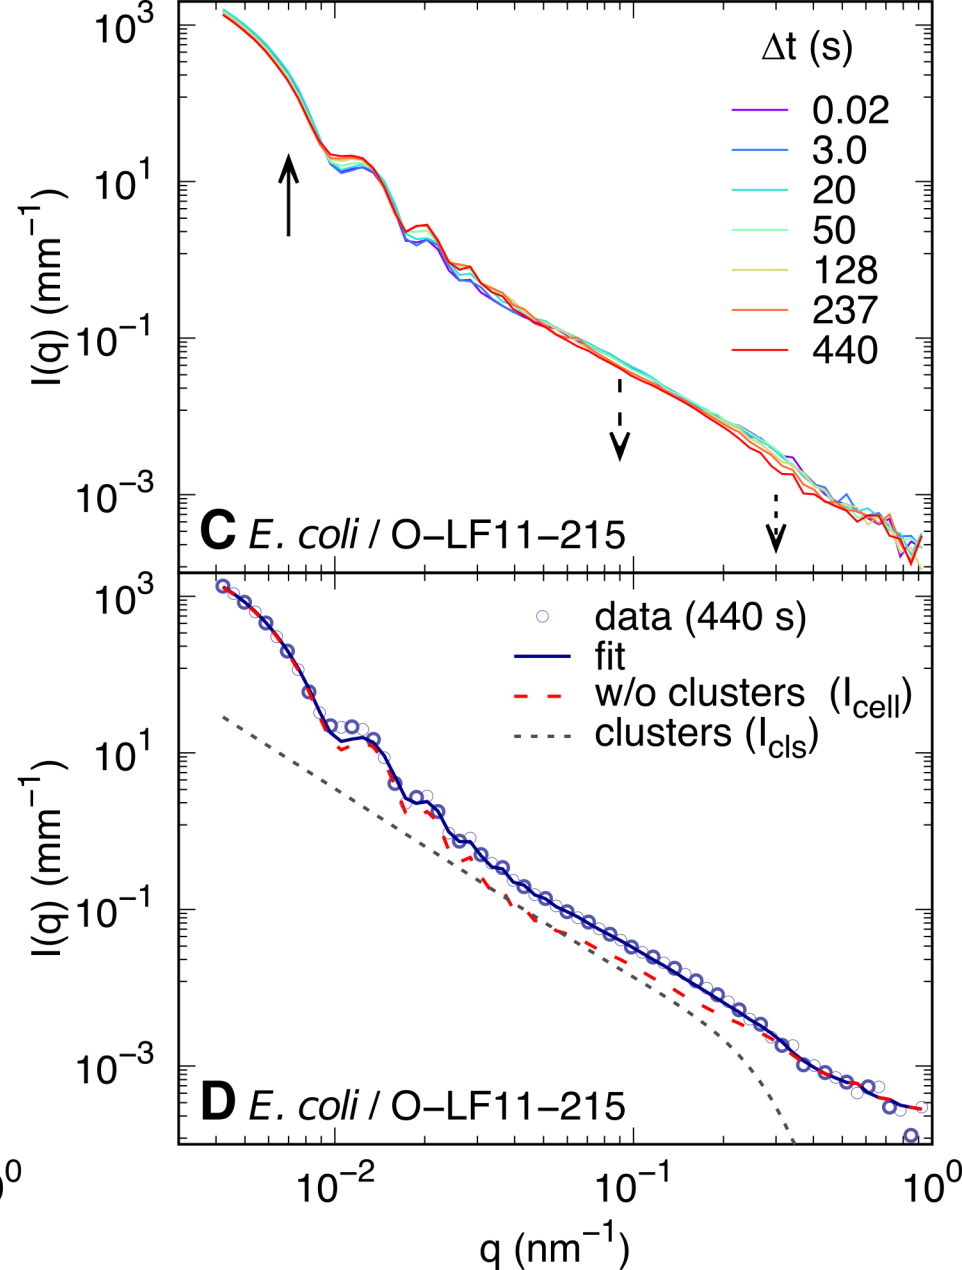

Supplement: supp [file elife-72850-supp-v1.zip]
